# Supplementary material for: Immune and non-immune cell subtypes identify novel targets for prognostic and therapeutic strategy: A study based on intratumoral heterogenicity analysis of multicenter scRNA-seq datasets in lung adenocarcinoma
Source: Front Immunol. 2022 Nov 22;13:1046121. doi: 10.3389/fimmu.2022.1046121 (PMC9723329; doi:10.3389/fimmu.2022.1046121)
Supplement: Supplementary file 2 [file Table_1.xlsx]

## Sheet: Table S1
Table S1. The DGEs in extremely abnormality in the metabolism of LUAD
	p_val	avg_log2FC	pct.1	pct.2	p_val_adj
SFTPC	0	-6.95404	0.069	0.587	1.19e-295
SFTPA1	0	-5.29733	0.084	0.567	3.5e-297
SFTPA2	0	-5.25562	0.097	0.573	2.63e-296
SFTPB	0	-4.19802	0.224	0.638	3.2e-296
SCGB3A2	0	-2.66837	0.164	0.402	2.49e-301
NAPSA	0	-2.50007	0.28	0.557	5.06e-267
SFTPD	0	-2.32336	0.143	0.424	3.89e-295
CLDN18	0	-2.26802	0.01	0.278	5.06e-267
CTSH	0	-2.20195	0.336	0.575	3.89e-261
SLC34A2	0	-2.15016	0.278	0.579	9.49e-293
LAMP3	0	-2.10608	0.107	0.342	1.19e-295
CD74	0	-1.88631	0.413	0.696	5.45e-277
ABCA3	0	-1.85235	0.068	0.266	2.45e-303
SEPP1	0	-1.83248	0.082	0.326	2.44e-300
RNASE1	0	-1.77427	0.301	0.517	2.18e-132
HLA-DRA	0	-1.75945	0.342	0.579	1.42e-140
NPC2	0	-1.70497	0.74	0.784	1.7e-257
SERPINA1	0	-1.68768	0.213	0.417	1.45e-298
SFTA2	0	-1.66295	0.246	0.448	3.09e-297
C4BPA	0	-1.63778	0.081	0.294	2.39e-285
PIGR	0	-1.62917	0.166	0.374	5.12e-226
TMSB4X	0	-1.58922	0.869	0.894	1.45e-263
C16orf89	0	-1.5742	0.095	0.312	2.57e-287
SELENBP1	0	-1.54709	0.15	0.339	1.64e-300
AQP1	0	-1.54253	0.103	0.301	3.2e-296
LPCAT1	0	-1.53869	0.226	0.359	9.49e-293
C3	0	-1.51375	0.196	0.362	4.53e-286
CYB5A	0	-1.49917	0.439	0.544	3.76e-260
SCD	2.45e-103	-1.49258	0.352	0.386	1.09e-98
DHCR24	1.39e-291	-1.47251	0.338	0.438	6.19e-287
HLA-DPB1	0	-1.44568	0.198	0.367	3.36e-142
EPAS1	1.6e-175	-1.42811	0.192	0.284	7.11e-171
HLA-DPA1	0	-1.40884	0.22	0.384	1.56e-142
FOLR1	0	-1.39175	0.112	0.295	3.11e-203
SLC39A8	0	-1.3776	0.108	0.271	8.52e-292
SLPI	0	-1.36981	0.5	0.665	9.36e-290
MUC1	0	-1.35916	0.393	0.562	6.26e-270
CPM	2.58e-246	-1.35898	0.185	0.308	1.15e-241
HLA-DRB1	0	-1.34492	0.262	0.448	2.18e-132
ADGRF5	0	-1.33369	0.131	0.283	6.96e-302
DRAM1	0	-1.31618	0.121	0.26	1.37e-245
ADIRF	1.19e-200	-1.30068	0.369	0.44	5.28e-196
FOS	0	-1.28554	0.625	0.672	5.72e-203
RPS17	0	-1.26206	0.235	0.474	2.25e-106
ATP5E	0	-1.21954	0.201	0.414	6.63e-294
ZFP36	2.31e-171	-1.21899	0.372	0.43	1.02e-166
CXCL17	5.51e-308	-1.18026	0.294	0.422	9.99e-144
ASAH1	2.88e-224	-1.1517	0.404	0.471	1.28e-219
CAT	9.85e-159	-1.1508	0.181	0.269	4.38e-154
CXCL2	1.5e-87	-1.12985	0.265	0.324	6.65e-83
RPL36A	5.01e-217	-1.10033	0.283	0.388	2.23e-212
TPT1	0	-1.09524	0.917	0.918	1.61e-258
SEPW1	4.67e-303	-1.07708	0.171	0.313	2.25e-106
VIM	4.73e-190	-1.07459	0.251	0.36	2.1e-185
CYR61	9.25e-158	-1.07163	0.163	0.256	4.11e-153
ATP5I	1.29e-285	-1.06392	0.15	0.284	5.73e-281
HOPX	3.21e-205	-1.06388	0.313	0.399	1.43e-200
MLPH	3.5e-147	-1.03585	0.178	0.265	1.56e-142
ICAM1	6.87e-29	-1.0325	0.29	0.305	3.05e-24
FOSB	1.32e-125	-1.02657	0.313	0.374	5.86e-121
ATP5MF	0	1.00188	0.667	0.277	7.23e-209
ELOB	0	1.01259	0.657	0.269	1.35e-194
AKR1C1	0	1.02164	0.539	0.274	2.32e-299
SEM1	0	1.03294	0.594	0.213	4.61e-200
MT-ND4L	0	1.03327	0.861	0.53	3.83e-276
ATP5PD	0	1.05987	0.627	0.247	1.09e-193
GAPDH	0	1.09802	0.901	0.679	1.09e-193
CBX3	0	1.09919	0.827	0.408	5.73e-281
CCT6A	0	1.10261	0.709	0.329	7.65e-278
S100P	0	1.10667	0.298	0.094	6.96e-302
KRT17	0	1.1108	0.627	0.278	2.08e-298
PSMA7	0	1.12121	0.948	0.576	1.53e-197
ATP5MG	0	1.12285	0.673	0.27	6.29e-172
ATP5F1E	0	1.13231	0.719	0.315	1.59e-213
PERP	0	1.13459	0.865	0.491	2.45e-233
ATP5MC3	0	1.18199	0.59	0.227	1.51e-186
HIST1H4C	0	1.27239	0.695	0.358	9.99e-144
C15orf48	0	1.28035	0.271	0.102	4.55e-288
LY6D	0	1.2948	0.254	0.061	9.32e-290
PABPC1	0	1.35833	0.985	0.725	3.62e-249
KRT6A	0	1.39798	0.516	0.207	1.5e-297
MT-ATP8	0	1.40613	0.782	0.365	5.45e-277
IGFBP3	0	1.43169	0.305	0.053	2.45e-303
S100A2	0	1.44061	0.547	0.207	1.76e-302
CSTA	0	1.52736	0.514	0.162	2.33e-261
KRT14	0	1.93953	0.253	0.083	7.21e-299
S100A9	0	2.13788	0.448	0.261	5.52e-302
S100A8	8.76e-266	2.52468	0.262	0.113	3.89e-261
SPRR1B	0	3.06894	0.267	0.049	8.05e-284

## Sheet: Table S2
Table S2. Clinicopathological features of clinical LUAD specimens
	Number of patients	Proportion (%)
Sex
male	13	0.52
female	12	0.48
Age
<=65	13	0.52
>65	12	0.48
Stage
T1	8	0.32
T2	12	0.48
T3	5	0.2
M0	16	0.64
M1	9	0.36
N0	14	0.56
N1	2	0.08
N2	9	0.36
Radiation therapy
Yes	3	0.12
No	22	0.88
Surgery
Yes	25	1
No	0	0
Futime
>=1	15	0.6
<1	10	0.4
